# Supplementary material for: Air-processed MAPbI3 perovskite solar cells achieve 20.87% efficiency and excellent bending resistance enabled via a polymer dual-passivation strategy
Source: Royal Society of Chemistry journal article supplement (doi:10.1039/d3dt02080k), 2023-01-01
Supplement: d3dt02080k1.pdf [file d3dt02080k1.pdf]

## Supplementary Material

Air-processed MAPbI<sub>3</sub> perovskite solar cells achieve 20.87% efficiency and excellent bending resistance enabled via polymer dual-passivation strategy

*Pengyun Zhang<sup>a</sup>, Jie Xiong<sup>a\*</sup>, Wei-Hsiang Chen<sup>b</sup>, Pingfan Du<sup>a</sup>, Lixin Song<sup>a\*</sup>*

<sup>a</sup> College of Textile Science and Engineering, Zhejiang Sci-Tech University, Hangzhou, 310018, China

<sup>b</sup> School of Science, Huzhou University, Huzhou, 313000, Zhejiang, China

**\* Corresponding Authors: [jxiong@zstu.edu.cn](mailto:jxiong@zstu.edu.cn) (J Xiong); [lsxong12@zstu.edu.cn](mailto:lsxong12@zstu.edu.cn) (LX Song).**

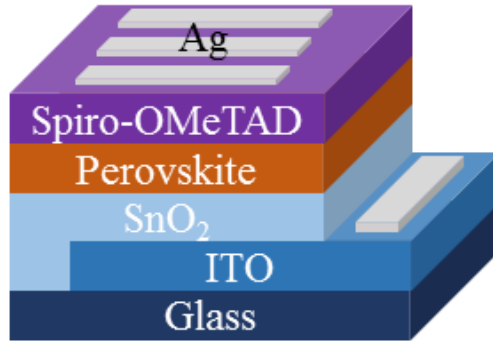

**Fig. S1.** The complete structure of perovskite (MAPbI<sub>3</sub>) solar cell.

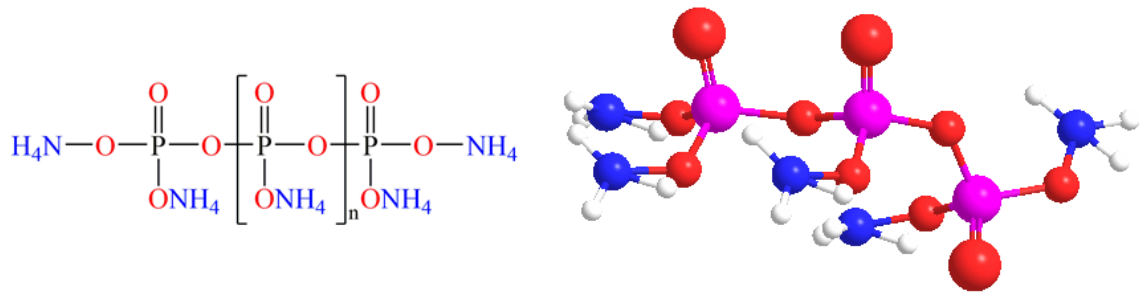

**Fig. S2.** The chemical formula of APP and corresponding simplified 3D structure.

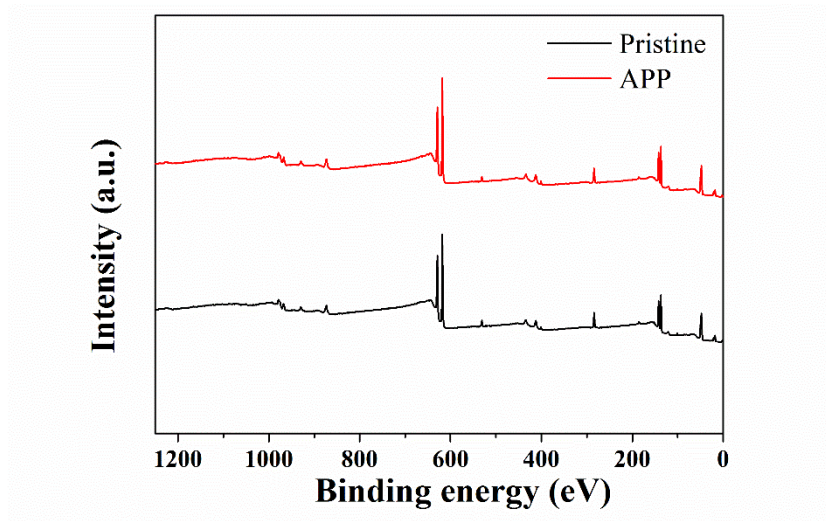

**Fig. S3.** The XPS survey spectra of the perovskite films (without/with APP).

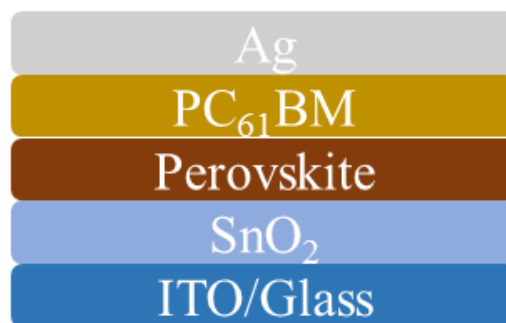

**Fig. S4.** The structure of electron-only device.

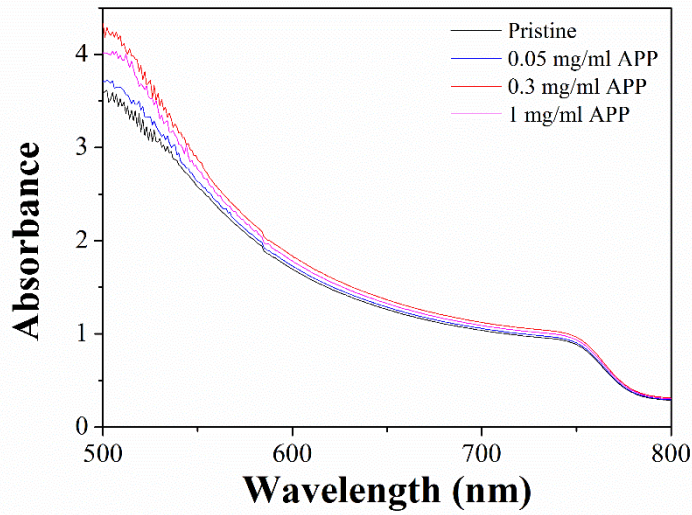

**Fig. S5.** The UV-vis spectra of perovskite film doping with different concentration of APP.

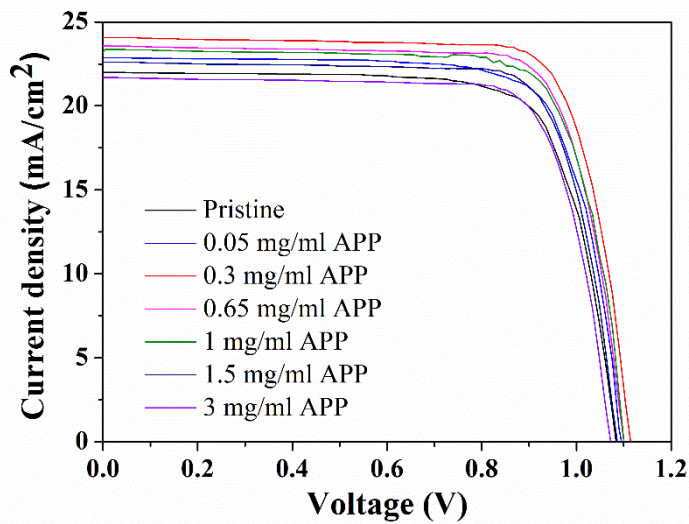

**Fig. S6.** The J-V curves of PSCs based on different concentration of APP.

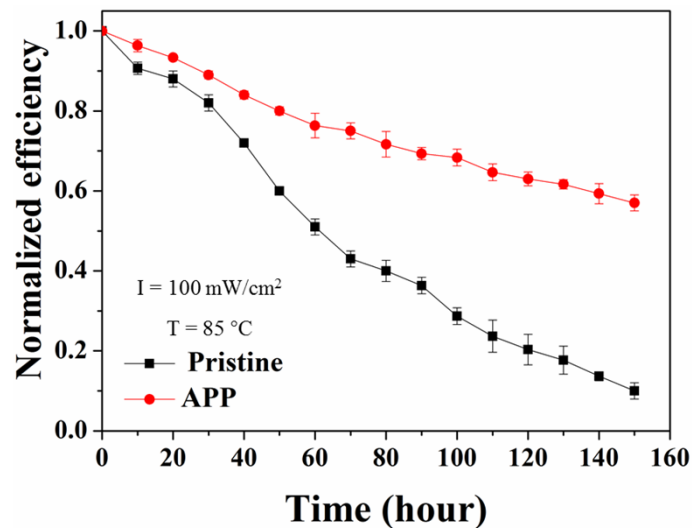

**Fig. S7.** Normalized PCE which investigated under continuous illumination (100 mW/cm)

and elevated temperature (85 °C) at the same time.

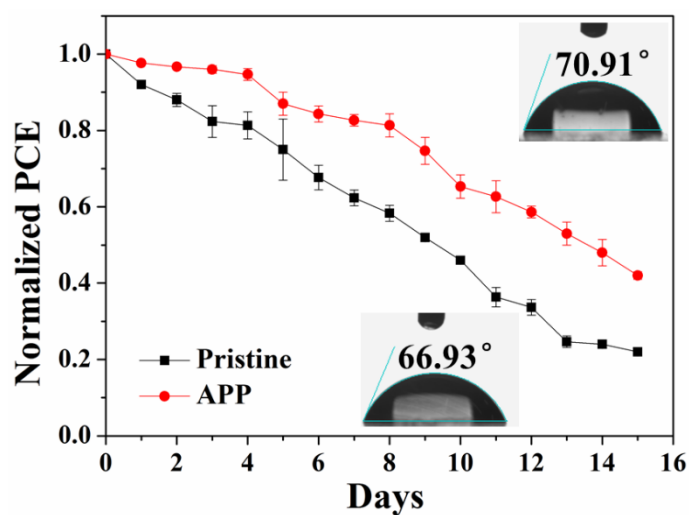

**Fig. S8.** The normalized PCE which investigated under 85 relative humidity for 15 days. The illustrations show the water-contact-angles images.

**Table S1.** Detailed photovoltaic parameters of PSCs doping with different concentrations of APP.

| Samples        | $J_{sc}$ (mA/cm <sup>2</sup> ) | $V_{oc}$ (V) | FF (%) | PCE (%) |
|----------------|--------------------------------|--------------|--------|---------|
| Pristine       | 21.99                          | 1.08         | 75.71  | 17.98   |
| 0.05 mg/ml APP | 22.86                          | 1.09         | 76.21  | 18.99   |
| 0.3 mg/ml APP  | 24.07                          | 1.12         | 77.42  | 20.87   |
| 0.65 mg/ml APP | 23.57                          | 1.10         | 77.64  | 20.13   |
| 1 mg/ml APP    | 23.36                          | 1.10         | 77.17  | 19.83   |
| 1.5 mg/ml APP  | 22.61                          | 1.09         | 77.22  | 19.03   |
| 3 mg/ml APP    | 21.69                          | 1.07         | 77.25  | 17.93   |
